# Supplementary material for: Dopamine Use and Its Consequences in The Intensive Care Unit: a Cohort Study Utilizing the Japanese Intensive care Patient Database
Source: Research Square preprint supplement (doi:10.21203/rs.3.rs-1205031/v1), 2021-12-30
Supplement: Supplementary file 1 [file 1f3871c7cb78bdd2d5b58bee.docx]

Data elements in the original data set (other than noted in the manuscript):

Surgery text

Tracheostomy at time of ICU admission

Maximum/minimum values of vital signs during the first 24 hours after ICU admission

Maximum/minimum laboratory values during the first 24 hours after ICU admission

Maximum value of serum bilirubin and lactate during the first 24 hours after ICU admission

Minimum value of platelet during the first 24 hours after ICU admission

Urine output during the first 24 hours after ICU admission

Japan Risk of Death (JROD) predicted in-hospital mortality

Pulmonary artery catheter during the first 24 hours after ICU admission

Acute physiology and chronic health evaluation (APACHE) II

APACHE II, APACHE III, Simplified acute physiology score (SAPS) II scores-predicted mortality

Placement of arterial line

Placement of central venous catheter

Non-invasive positive pressure ventilation (NPPV)

Veno-arterial extracorporeal membrane oxygenation (VA-ECMO)

Veno-veno extracorporeal membrane oxygenation (VV-ECMO)

Intermittent renal replacement therapy (IRRT)

Continuous replacement therapy (CRRT)

Plasma exchange

Polymyxin B-immobilized fiber column hemoperfusion

Other hemofiltration

Tracheostomy

Date of tracheostomy

Intra-aortic balloon pump

Variables included in the generalized estimating equation model for propensity score

Year, age, gender, weight, height, comorbidities (each), days after hospital admission to intensive care unit (ICU) admission, code blue or Rapid response team / Medical emergency team leading to the ICU admission, cardiopulmonary resuscitation leading to the ICU admission, the reason for ICU admission, diagnosis code, Acute physiology and chronic health evaluation (APACHE) II, APACHE III, Simplified acute physiology score (SAPS) II, the maximum lactate level at baseline, along with the vital signs and laboratory results at baseline (maximum and minimum values of heart rate, mean arterial pressure, temperature, respiratory rate, hematocrit, white blood cell, creatinine, blood urea nitrogen, sodium, potassium, blood glucose), Glasgow Coma Score at baseline, urine output at baseline, mechanical ventilation at baseline, Acute kidney injury (AKI) at baseline, dobutamine use, and adrenaline use. Bilirubin, platelet, and albumin were not added to the model due to excessive missing values.

Supplemental Table 1. Baseline vital signs and lab values, stratified by dopamine and noradrenaline use

|  | Dopamine  (N = 2750) | Dopamine + noradrenaline  (N = 1903) | Noradrenaline  (N = 9941) | p-value |
| --- | --- | --- | --- | --- |
| Vital signs during the first 24 hours |  |  |  |  |
| HR - max | 100.08 (19.45) | 108.23 (23.37) | 111.92 (24.68) | <0.001 |
| HR - min | 68.05 (13.55) | 72.39 (15.86) | 72.14 (16.37) | <0.001 |
| MAP - max | 96.08 (15.31) | 94.22 (15.93) | 98.76 (17.85) | <0.001 |
| MAP - min | 58.68 (11.04) | 55.12 (10.49) | 55.27 (11.23) | <0.001 |
| T - max | 37.75 (0.71) | 37.79 (0.88) | 37.91 (0.96) | <0.001 |
| T - min | 36.17 (0.81) | 36.01 (0.93) | 36.21 (0.95) | <0.001 |
| R - max | 24.37 (6.03) | 24.38 (6.58) | 26.70 (7.10) | <0.001 |
| R - min | 11.34 (3.20) | 11.99 (3.44) | 12.37 (3.76) | <0.001 |
| GCS.E | 3.73 (0.79) | 3.47 (1.05) | 3.36 (1.07) | <0.001 |
| GCS.V | 4.58 (1.14) | 4.22 (1.48) | 4.06 (1.51) | <0.001 |
| GCS.M | 5.68 (1.08) | 5.30 (1.59) | 5.25 (1.56) | <0.001 |
| GCS | 13.99 (2.88) | 13.00 (3.97) | 12.68 (3.95) | <0.001 |
| Lab values during the first 24 hours |  |  |  |  |
| Hct - max | 32.99 (4.82) | 33.14 (5.14) | 33.08 (5.93) | 0.651 |
| Hct - min | 29.67 (4.80) | 29.17 (4.95) | 29.04 (5.82) | <0.001 |
| WBC - max | 11.79 (5.77) | 12.71 (6.60) | 13.52 (9.44) | <0.001 |
| WBC - min | 9.37 (4.95) | 9.72 (5.55) | 10.66 (8.17) | <0.001 |
| Cre - max | 1.49 (1.58) | 1.79 (1.74) | 1.89 (1.98) | <0.001 |
| Cre - min | 1.24 (1.31) | 1.49 (1.50) | 1.58 (1.69) | <0.001 |
| BUN - max | 22.86 (15.69) | 27.96 (18.67) | 31.70 (24.71) | <0.001 |
| Urine output during the first 24 hours | 2037.32 (1510.30) | 1696.98 (1248.75) | 1421.69 (1188.63) | <0.001 |
| Na - max | 142.51 (4.64) | 142.74 (5.65) | 141.26 (5.67) | <0.001 |
| Na - min | 137.12 (5.14) | 136.71 (5.37) | 135.87 (5.65) | <0.001 |
| K - max | 4.55 (0.61) | 4.70 (0.71) | 4.61 (0.77) | <0.001 |
| K - min | 3.73 (0.46) | 3.76 (0.55) | 3.74 (0.56) | 0.123 |
| Blood glucose - max | 197.01 (56.77) | 206.95 (72.41) | 196.77 (80.12) | <0.001 |
| Blood glucose - min | 125.57 (30.36) | 121.69 (33.65) | 116.06 (36.22) | <0.001 |

Table Notes. HR: heart rate, MAP: mean arterial pressure, T: temperature, R: respiratory rate, GCS: Glasgow coma scale, GCS.E: Glasgow coma scale (eye), GCS.V: Glasgow coma scale (verbal), GCS.M: Glasgow coma scale (motor), Hct: Hematocrit, WBC: white blood cell, Cre: serum creatinine, BUN: blood urea nitrogen, Na: sodium, K: potassium. Continuous variables presented with mean(s) and SD(s).

Supplemental Table 2. Baseline characteristics of hospitals stratified by frequency of dopamine use

|  | Dopamine infrequent user  (N = 28) | Dopamine frequent user  (N = 28) | p-value |
| --- | --- | --- | --- |
| Hospital Type (%) |  |  | 0.049 |
| Private Hospital | 3 (11.1) | 6 (21.4) |  |
| Public Hospital | 16 (57.1) | 7 (25.0) |  |
| University Hospital | 9 (32.1) | 15 (53.6) |  |
| Hospital beds (mean, SD) | 751.5 (289.9) | 684.6 (245.6) | 0.356 |
| Intensive care unit beds (mean, SD) | 11.0 (5.1) | 11.7 (5.1) | 0.603 |
| Board certified intensivists (mean, SD) | 4.8 (3.1) | 4.2 (3.0) | 0.486 |
| Nurses (mean, SD) | 35.4 (13.5) | 36.6 (17.0) | 0.775 |

Supplemental Table 3. The baseline vital signs and lab values of propensity-matched groups for dopamine use

|  | Control  (N = 3322) | Dopamine  (N = 3322) | SMD |
| --- | --- | --- | --- |
| Vital signs during the first 24 hours |  |  |  |
| HR - max | 104.1 (21.1) | 105.0 (21.4) | 0.042 |
| HR - min | 69.8 (14.6) | 70.5 (14.9) | 0.051 |
| MAP - max | 97.3 (16.0) | 95.8 (15.6) | 0.095 |
| MAP - min | 56.7 (10.9) | 56.6 (10.6) | 0.013 |
| T - max | 37.9 (0.8) | 37.8 (0.8) | 0.038 |
| T - min | 36.2 (0.9) | 36.1 (0.9) | 0.08 |
| R - max | 24.5 (6.4) | 24.4 (6.4) | 0.013 |
| R - min | 11.5 (3.3) | 11.4 (3.2) | 0.04 |
| GCS.E | 3.6 (0.9) | 3.6 (1.0) | 0.058 |
| GCS.V | 4.4 (1.3) | 4.3 (1.4) | 0.069 |
| GCS.M | 5.5 (1.3) | 5.4 (1.4) | 0.058 |
| GCS | 13.6 (3.4) | 13.3 (3.7) | 0.064 |
| Lab values during the first 24 hours |  |  |  |
| Hct - max | 33.4 (5.2) | 32.7 (4.8) | 0.124 |
| Hct - min | 28.8 (5.2) | 29.1 (4.7) | 0.052 |
| WBC - max | 12.2 (6.1) | 12.0 (5.9) | 0.025 |
| WBC - min | 9.2 (5.2) | 9.4 (5.0) | 0.029 |
| Cre - max | 1.6 (1.7) | 1.6 (1.6) | 0.032 |
| Cre - min | 1.3 (1.4) | 1.3 (1.4) | 0.016 |
| BUN - max | 24.5 (17.0) | 24.7 (16.6) | 0.013 |
| Urine output during the first 24 hours | 1674.6 (1276.1) | 1789.7 (1220.2) | 0.092 |
| Na - max | 142.5 (4.9) | 142.9 (5.0) | 0.083 |
| Na - min | 137.3 (5.0) | 137.1 (5.3) | 0.035 |
| K - max | 4.7 (0.7) | 4.6 (0.6) | 0.086 |
| K - min | 3.8 (0.5) | 3.7 (0.5) | 0.141 |
| Blood glucose - max | 201.4 (73.8) | 204.2 (66.4) | 0.041 |
| Blood glucose - min | 121.8 (31.2) | 123.3 (32.0) | 0.045 |

Table Notes. SMD: standard mean difference, HR: heart rate, MAP: mean arterial pressure, T: temperature, R: respiratory rate, GCS: Glasgow coma scale, GCS.E: Glasgow coma scale (eye), GCS.V: Glasgow coma scale (verbal), GCS.M: Glasgow coma scale (motor), Hct: Hematocrit, WBC: white blood cell, Cre: serum creatinine, BUN: blood urea nitrogen, Na: sodium, K: potassium. Continuous variables presented with mean(s) and SD(s).

Supplemental Table 4-1: The results of propensity-matched analysis. Cardiovascular diagnosis only

|  | Control (N = 2325) | Dopamine  (N = 2329) | p-value |
| --- | --- | --- | --- |
| Death at time of hospital discharge (%) | 200 (8.6) | 249 (10.7) | 0.018 |
| Death at time of ICU discharge (%) | 109 (4.7) | 135 (5.8) | 0.103 |
| ICU Length of stay (mean days, SD) | 6.3 (9.98) | 7.0 (10.25) | 0.017 |
| Hospital Length of stay (mean days, SD) | 37.6 (39.8) | 38.6 (35.4) | 0.354 |
| Duration of the 1st mechanical ventilation (mean days, SD) | 3.0 (9.7) | 3.1 (6.2) | 0.703 |

Table Notes. ICU: Intensive care unit

Supplemental Table 4-2: The results of propensity-matched analysis. Infection diagnosis only

|  | Control (N = 238) | Dopamine (N = 217) | p-value |
| --- | --- | --- | --- |
| Death at time of hospital discharge (%) | 74 (31.1) | 74 (34.1) | 0.559 |
| Death at time of ICU discharge (%) | 36 (15.1) | 35 (16.1) | 0.869 |
| ICU Length of stay (mean days, SD) | 8.5 (7.70) | 11.3 (12.61) | 0.004 |
| Hospital Length of stay (mean days, SD) | 56.9 (51.8) | 69.9 (69.5) | 0.023 |
| Duration of the 1st mechanical ventilation (mean days, SD) | 5.5 (6.3) | 8.3 (11.8) | 0.001 |

Table Notes. ICU: Intensive care unit

Supplemental Table 4-3: The results of propensity-matched analysis. Other diagnosis only

|  | Control (N = 759) | Dopamine (N = 776) | p-value |
| --- | --- | --- | --- |
| Death at time of hospital discharge (%) | 123 (16.2) | 109 (14.0) | 0.267 |
| Death at time of ICU discharge (%) | 55 (7.2) | 54 (7.0) | 0.905 |
| ICU Length of stay (mean days, SD) | 6.7 (10.5) | 7.5 (11.9) | 0.158 |
| Hospital Length of stay (mean days, SD) | 51.70 (49.24) | 49.94 (47.86) | 0.478 |
| Duration of the 1st mechanical ventilation (mean days, SD) | 4.18 (9.74) | 4.39 (10.89) | 0.698 |

Table Notes. ICU: Intensive care unit

Supplemental Table 5: The results of propensity-score matching, no dopamine vs dopamine <= 5 μg/kg/min

|  | No dopamine | Dopamine <=5 μg/kg/min | p value |
| --- | --- | --- | --- |
|  | (N = 2754) | (N = 2754) |  |
| Death at time of hospital discharge (%) | 278 (10.1) | 245 (8.9) | 0.141 |
| Death at time of ICU discharge (%) | 129 (4.7) | 122 (4.4) | 0.698 |
| ICU Length of stay (mean days, SD) | 6.1 (9.5) | 6.9 (10.2) | 0.002 |
| Hospital Length of stay (mean days, SD) | 39.8 (41.1) | 41.7 (39.9) | 0.077 |
| Duration of the 1st mechanical ventilation (mean days, SD) | 2.8 (9.0) | 3.1 (7.9) | 0.253 |

Supplemental Table 6-1: The results of propensity-matched analysis on surgical patients only (both cardiac and non-cardiac)

|  | No dopamine | Dopamine | | p value | |
| --- | --- | --- | --- | --- | --- |
|  | (N = 2661) | (N = 2733) | |
| Death at time of hospital discharge (%) | 162 (6.1) | 199 (7.3) | | 0.089 | |
| Death at time of ICU discharge (%) | 78 (2.9) | 104 (3.8) | | 0.089 | |
| ICU Length of stay (mean days, SD) | 5.6 (8.1) | 6.5 (9.5) | | <0.001 | |
| Hospital Length of stay (mean days, SD) | 41.1 (41.8) | 40.8 (36.7) | | 0.76 | |
| Duration of the 1st mechanical ventilation (mean days, SD) | 2.3 (8.7) | 2.7 (7.5) | | 0.106 | |
|  |  | |  | |  | |

Supplemental Table 6-2: The results of propensity-matched analysis cardiac surgical patients only

|  | No Dopamine | Dopamine | p value |
| --- | --- | --- | --- |
|  | (N = 2013) | (N = 2011) |  |
| Death at time of hospital discharge (%) | 91 (4.5) | 119 (5.9) | 0.055 |
| Death at time of ICU discharge (%) | 51 (2.5) | 69 (3.4) | 0.114 |
| ICU Length of stay (mean days, SD) | 5.6 (8.6) | 6.2 (8.4) | 0.04 |
| Hospital Length of stay (mean days, SD) | 36.7 (37.5) | 37.5 (32.1) | 0.481 |
| Duration of the 1st mechanical ventilation (mean days, SD) | 2.2 (9.6) | 2.3 (5.5) | 0.782 |

Supplemental Table 6-3: The results of propensity-matched analysis on non-cardiac surgical patients

|  | No Dopamine | Dopamine | p value |
| --- | --- | --- | --- |
|  | (N = 648) | (N = 722) |  |
| Death at time of hospital discharge (%) | 71 (11.0) | 80 (11.1) | 1 |
| Death at time of ICU discharge (%) | 27 (4.2) | 35 (4.8) | 0.635 |
| ICU Length of stay (mean days, SD) | 5.7 (6.6) | 7.4 (12.1) | 0.001 |
| Hospital Length of stay (mean days, SD) | 54.7 (50.7) | 49.9 (46.1) | 0.066 |
| Duration of the 1st mechanical ventilation (mean days, SD) | 2.7 (5.1) | 3.9 (11.4) | 0.021 |

Supplemental Table 7: Propensity-matched analysis on patients admitted through emergency admissions only

|  | No dopamine | Dopamine | p-value |
| --- | --- | --- | --- |
|  | (N = 1292) | (N = 1352) |  |
| Death at time of hospital discharge (%) | 333 (25.8) | 369 (27.3) | 0.401 |
| Death at time of ICU discharge (%) | 164 (12.7) | 189 (14.0) | 0.36 |
| ICU Length of stay (mean days, SD) | 9.1 (12.4) | 10.2 (12.8) | 0.032 |
| Hospital Length of stay (mean days, SD) | 47.9 (50.0) | 50.0 (51.2) | 0.274 |
| Duration of the 1st mechanical ventilation (mean days, SD) | 5.8 (9.6) | 6.3 (9.2) | 0.206 |

Supplemental Table 8: Propensity-matched analysis on all patients with the dopamine group stratified by dose ranges

| Dopamine dose range | No use | <= 5 µg/kg/min | 5-15 µg/kg/min | > 15 µg/kg/min | p-value |
| --- | --- | --- | --- | --- | --- |
|  | (N = 3322) | (N = 2679) | (N = 605) | (N = 38) |  |
| Proportion of noradrenaline use | 100% | 37% | 61% | 90% |  |
| Death at hospital discharge (%) | 397 (12.0) | 241 (9.0) | 164 (27.1) | 27 (71.1) | <0.001 |
| Death at ICU discharge (%) | 200 (6.0) | 118 (4.4) | 90 (14.9) | 16 (42.1) | <0.001 |
| ICU Length of stay (mean (SD)) | 6.5 (10) | 6.9 (10.2) | 9.7 (13.2) | 8.3 (8.4) | <0.001 |
| Hospital Length of stay (mean (SD)) | 42.2 (43.7) | 41.2 (40.2) | 50.4 (50.9) | 29.5 (38.9) | <0.001 |
| Duration of the 1st mechanical ventilation (mean (SD)) | 3.3 (9.5) | 3.1 (8.0) | 5.4 (8.4) | 6.6 (7.5) | <0.001 |
